# Supplementary material
Source: Springer Nature journal article supplement (https://www.springermedizin.de/resource/supplementary/12885_2013_4406_MOESM1_ESM.pdf/9466346)
Supplement: MOESM1 [file 9466346]

Diagnosis- Surgery

Chemotherapy and/or Radiation

T1

Progressive combined  
exercise training

T2

Follow-up  
Period

T3

...

-1

0

1

2

...

17

18

...

30

31

... 34

Screening/  
Informed Consent

Randomization

Progressive combined  
exercise training  
(Optional- Control Group)
